# Supplementary material for: Space charge layer effect at the platinum anode/BaZr0.9Y0.1O3−δelectrolyte interface in proton ceramic fuel cells
Source: Royal Society of Chemistry journal article supplement (doi:10.1039/d0ta03339a), 2020-01-01
Supplement: d0ta03339a1.pdf [file d0ta03339a1.pdf]

## Electronic Supplementary Information

### Space Charge Layer Effect at the Platinum anode/BaZr<sub>0.9</sub>Y<sub>0.1</sub>O<sub>3-δ</sub> electrolyte Interface in Proton Ceramic Fuel Cells

Min Chen <sup>a, b, \*</sup>, Xiaobin Xie, Jinhua Guo, Dongchu Chen <sup>a</sup>, Qing Xu <sup>c, \*</sup>

<sup>a</sup> School of Materials Science and Energy Engineering, Foshan University, Foshan 528000,

People's Republic of China

<sup>b</sup> Centre for Materials Science and Nanotechnology (SMN), Department of Chemistry,  
University of Oslo, NO-0349 Oslo, Norway.

<sup>c</sup> School of Materials Science and Engineering, Wuhan University of Technology, Wuhan  
430070, People's Republic of China.

\* Corresponding author. *Email address:* [minchen1981@126.com](mailto:minchen1981@126.com); [xuqing@whut.edu.cn](mailto:xuqing@whut.edu.cn)

#### 1. Derivation of Equation 7 in the manuscript

As the ECT reaction (Equation 6) is in equilibrium, the relationship of

$$\mu_{H_{int}} + \tilde{\mu}_{O_2^-} = \tilde{\mu}_{OH^-} + \tilde{\mu}_{e^-}$$

(S1)

can be obtained, where  $\mu$  and  $\tilde{\mu}$  represent chemical potential and electrochemical potential, respectively. Considering the relationship between  $\varphi(0)$  (electrical potential at  $x = 0$ ) and  $\varphi(\text{Pt})$  (electrical potential at the Pt electrode), Equation S1 can be further written as:

$$\mu_{H_{int}} + \mu_{O_2^-} - 2F\varphi(0) = \mu_{OH^-} - F\varphi(0) + \mu_{e^-} - F\varphi(\text{Pt})$$

(S2)

giving the expression of Equation 7 in the manuscript.

## 2. Derivation of space charge layer resistance ( $R_{SCL}^{(PT)}$ )

As presented in Figure 2, the resistance of protons transport through the space charge layer ( $R_{SCL}^{(PT)}$ ) can be expressed as:

$$R_{SCL}(H^+) = \rho_{SCL}^{eff} \frac{\lambda}{S} = \frac{\int_0^\lambda \rho_{SCL}(x) dx}{S} = \frac{\int_0^\lambda \frac{1}{\sigma_{SCL}(x)} dx}{S} = \frac{\int_0^\lambda \frac{1}{euC_{H^+}^{SCL}(x)} dx}{S} \quad (S3)$$

where  $\rho_{SCL}(x)$  and  $\sigma_{SCL}(x)$  represents the resistivity and conductivity at the position of  $x$  in the SCL, respectively. And also,  $u$  is the mobility of protons and  $S$  is the effective area of  $R_{SCL}(H^+)$ .

The concentration of protons ( $C_{H^+}^{SCL}$ ) in the SCL is given by:

$$C_{H^+}^{SCL} = C_{H^+}^{bulk} \exp\left(\frac{-zF\Delta\phi(x)}{RT}\right) \quad (z = 1) \quad (S4)$$

where  $C_{H^+}^{bulk}$  represents the concentration of protons in the bulk of the electrolyte,

Introducing (S4) in (S3) results in:

$$R_{SCL}(H^+) = \frac{1}{euSC_{H^+}^{bulk}} \int_{x_1}^{x_1+\lambda} \exp\left(\frac{F\Delta\phi(x)}{RT}\right) dx \quad (S5)$$

## 2. Configuration of three electrode electrochemical cells

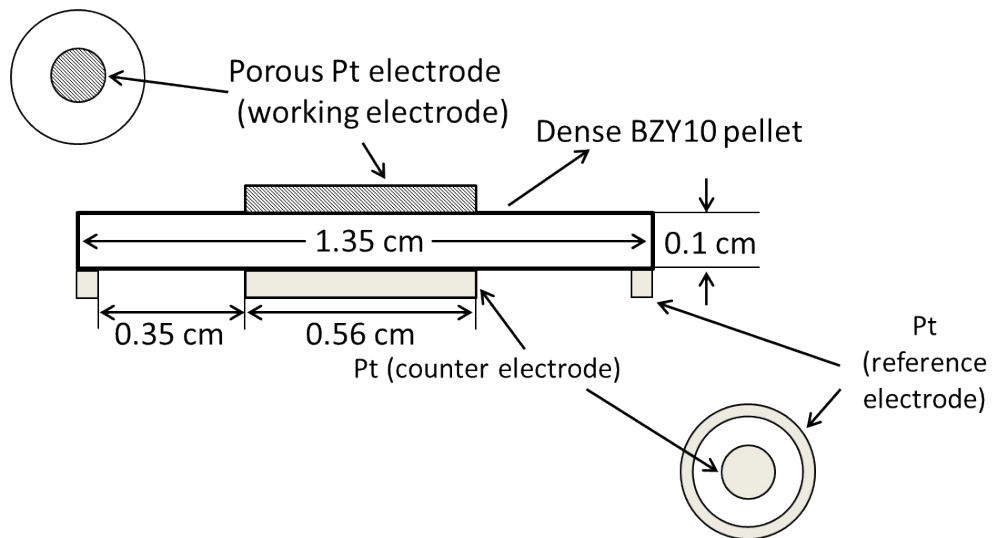

Figure S1. Schematic diagram and geometrical parameters of the three electrode electrochemical cells.

## 3. Derivation of coverage of atomic hydrogen ( $\theta^H$ ) as a function of $pH_2$

The  $H_2$  dissociative absorption on the porous Ni electrode can be expressed by:

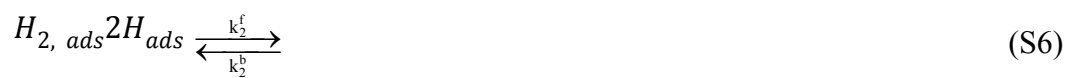

where the superscripts of f and b represent the forward and backward reaction, respectively, and  $k_2$  is the rate constant. The net reaction rate  $v_2$  of this reaction can be written as:

$$v_2 = v_f - v_b = k_2^f(1 - \theta^H)pH_2 - k_2^b(\theta^H)^2 \quad (S7)$$

Equation (S7) solved for the equilibrium state ( $v_f = v_b$ ) gives:

$$\frac{pH_2^{0.5}}{\theta^H} = \frac{1}{K^{0.5}} + pH_2^{0.5} \left( K = \frac{k_2^f}{k_2^b} \right)$$

(S8)

representing the typical linearized Langmuir isotherm for dissociative adsorption. In addition, the experimental data in the inset of Figure 4(a) gives:

$$\frac{1}{R_{ECT}^{OCP}} \propto pH_2^{0.18} \quad (S9)$$

Introducing Equation S9 into Equation 22 gives (Assuming  $\alpha_f = 0.5$ )

$$\theta^H \propto pH_2^{0.36} \quad (\theta^H = A \cdot pH_2^{0.36}) \quad (S10)$$

Further introducing Equation S10 into S8 gives:

$$pH_2^{0.14} = \frac{A}{K^{0.5}} + A \cdot pH_2^{0.5} \quad (S11)$$

Subsequently applying the linear fitting on Equation S11 gives the values of A and  $K^{0.5}$ , as displayed in Figure S2. Finally, introducing the  $K^{0.5}$  value into Equation S8 gives the variation of  $\theta^H$  value as a function of  $pH_2$ , as presented in Figure 5.

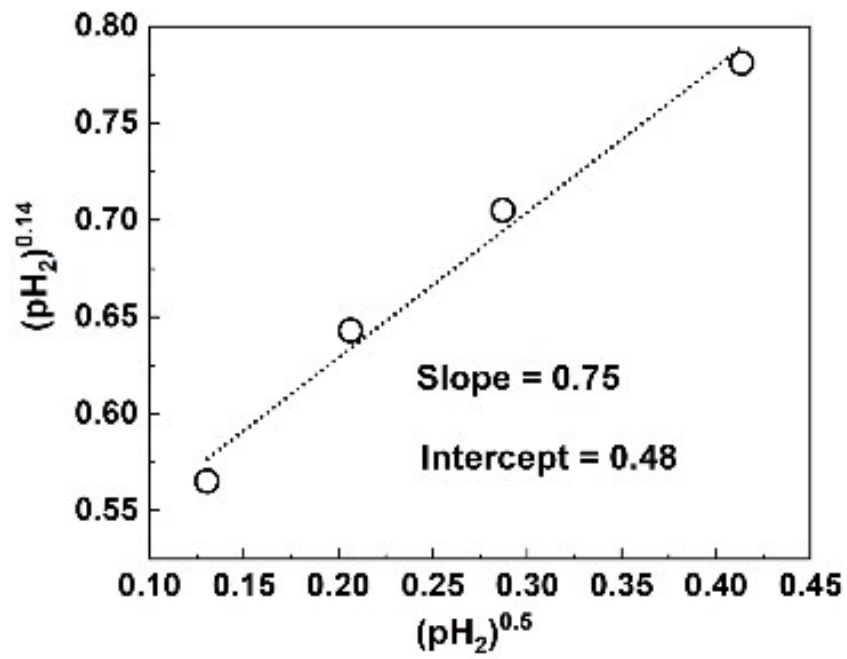

Figure S2 Linear fitting of  $pH_2^{0.14}$  as a function of  $pH_2^{0.5}$  in terms of Equation S11

#### 4. Dependency of $C_{H^+}^{bulk}$ of BZY10 ceramics on $pH_2O$

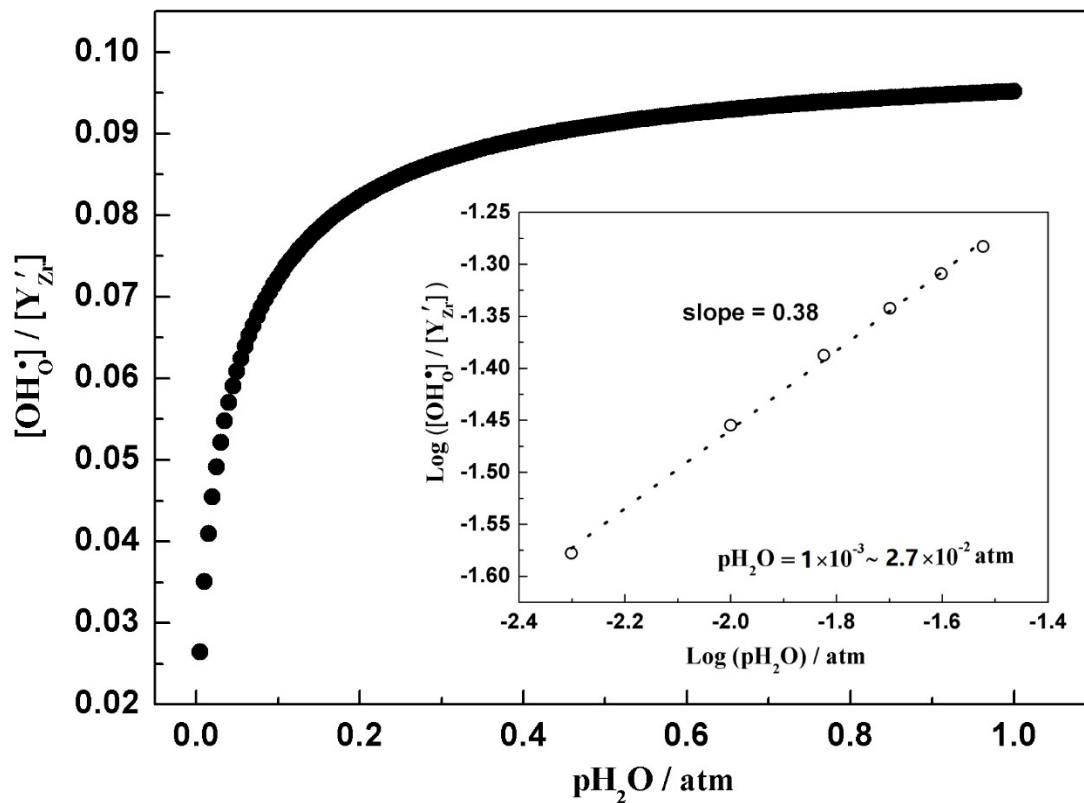

Figure S3. Normalized proton concentration ( $OH^{\bullet}_0/Y'_{Zr}$ ) in the bulk of the BZY10 material ( $C_{H^+}^{bulk}$ ) as a function of  $p_{H_2O}$  at 600°C in reducing atmosphere.
